# Supplementary material for: Compact and stable SNAP ligand-conjugated quantum dots as a fluorescent probe for single-molecule imaging of dynein motor protein
Source: Royal Society of Chemistry journal article supplement (doi:10.1039/c5cc05526a), 2015-01-01
Supplement: c5cc05526a1.pdf [file c5cc05526a1.pdf]

Electronic Supporting Information

**Compact and stable SNAP ligand-conjugated quantum dots as a fluorescent probe for single-molecule imaging of dynein motor protein**

Tatsuya Ohyanagi, Tomohiro Shima, Yasushi Okada, Yoshikazu Tsukasaki, Akihito, Komatsuzaki, Setsuko Tsuboi and Takashi Jin\*

**Experimental details**

**1. Materials**

Cadmium 2,4-pentanedionate (98%) and 11-mercaptoundecanoic acid (MUA) were purchased from Alfa Aesar. Selenium powder 100 mesh (99.99%) and tellurium 40 mesh (99.997%) were purchased from Aldrich. Tri-*n*-octylphosphine oxide (TOPO, > 95%), tri-*n*-octylphosphine (TOP), hexadecylamine (HDA), bis(trimethylsilyl) sulfide (TMS<sub>2</sub>S), tributylphosphine (TBP), and diethylzinc (1.0 M in hexane) were purchased from Tokyo Chemical Industry. Dimethylcadmium (10 wt% in hexane) was purchased from Stream chemicals. *n*-Octadecylphosphonic acid (ODPA) was purchased from PCI Synthesis. Except where otherwise noted, all solvents and reagents for the synthesis of BG-SH ligands were purchased from Wako Pure Chemical Industries Ltd. (Japan), Tokyo Chemical Industry (Japan), and Aldrich Chemical Co. (USA) and were used without further purification.

**2. Synthesis**

1) Synthesis of BG-SH ligand (**1**)

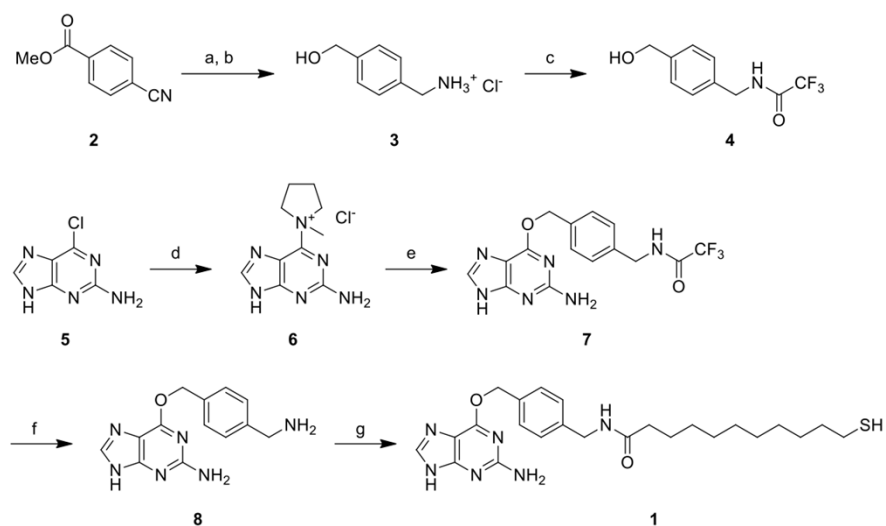

**Scheme 1.** a) LiAlH<sub>4</sub>, THF, 50 °C; b) HCl, 67% (2steps); c) CF<sub>3</sub>COOC<sub>2</sub>H<sub>5</sub>, TEA, MeOH, r.t., 17h, 50%; d) 1-methylpyrrolidin, DMF, r.t., 24h, 50%; e) **4**, NaH, DMF, r.t., 24h, 50%; f) K<sub>2</sub>CO<sub>3</sub>, MeOH, r.t., 11h, 80%; g) 11-mercaptoundecanoic acid *N*-succinimidyl ester, DMAP, CH<sub>2</sub>Cl<sub>2</sub>, r.t., 5h, 40%.

#### 4-(Aminomethyl)-benzyl alcohol (3)

To a solution of Methyl 4-cyanobenzoate (**2**) (5 g, 31 mmol) in anhydrous THF (50 mL) were added LiAlH<sub>4</sub> in anhydrous THF (200 mL) slowly at 0 °C. The reaction mixture was stirred for additional 1 h at room temperature. After 15 h of stirring at 50 °C, the reaction was cooled to room temperature and quenched with H<sub>2</sub>O (5.9 mL), 15% NaOH (5.9 mL) and H<sub>2</sub>O (17.7 mL). The resulting precipitate was filtered by celite, washed with THF, and filtrate was concentrated in vacuo. The residue was added in 1 M HCl (50 mL) and extracted with EtOAc (50 mL). The aqueous layer was concentrated *in vacuo*. The residue was added to acetone (50 mL) and the suspension was filtered to give **3** (3.60 g, 67%) as a white solid. <sup>1</sup>H-NMR (400 MHz, D<sub>2</sub>O, 298 K) δ = 4.26 (s, 2H, -CH<sub>2</sub>-NH<sub>2</sub>-), 4.64 (s, 2H, -CH<sub>2</sub>-OH), 7.45 (s, 4H, Ar). MS (ESI) (m/z) calcd for C<sub>8</sub>H<sub>12</sub>NO, [M+H]<sup>+</sup>: 137.08; found: 138.09.

#### 2,2,2-Trifluoro-N-(4-hydroxymethyl-benzyl)-acetamide (4)

To a solution of **3** (3.47 g, 20 mmol) and triethylamine (1.76 mL, 20 mmol) in MeOH (20 mL) were added trifluoroacetic acid ethyl ester (3.1 mL, 26 mmol) at room temperature. After 17 h of stirring, the reaction mixture was concentrated *in vacuo*. The residue was extracted with EtOAc and washed with brine, and was dried over Na<sub>2</sub>SO<sub>4</sub>, and concentrated in vacuo. The crude residue was dissolved in CHCl<sub>3</sub> and MeOH, adsorbed on SiO<sub>2</sub> (10 g), and purified by column chromatography with CHCl<sub>3</sub> : MeOH (20 : 1) to give **4** (3.48 g, 74%) as a white solid. <sup>1</sup>H-NMR (400 MHz, CDCl<sub>3</sub>, 298 K, TMS) δ = 1.74 (br, 1H, -OH), 4.52 (d, J = 5.5 Hz, 2H, -CH<sub>2</sub>-NH<sub>2</sub>-), 4.69 (s, 2H, -CH<sub>2</sub>-OH), 7.25-7.38 (s, 4H, Ar). MS (ESI) (m/z) calcd for C<sub>10</sub>H<sub>10</sub>F<sub>3</sub>NO<sub>2</sub>Na, [M+Na]<sup>+</sup>: 256.06; found: 256.06.

#### 1-(2-Amino-7H-purin-6-yl)-1-methyl-pyrrolidinium chloride (6)

1-Methylpyrrolidin (18.0 g, 210 mmol) was added to a suspension of 2-amino-6-chloropurine (**5**) (16.9 g, 100 mmol) in anhydrous DMF (300 mL) and the reaction mixture was stirred for 24 h at room temperature. Acetone (50 mL) was added and the precipitate was filtered affording of pure **6** (16.1 g, 63%) as a white solid.

<sup>1</sup>H-NMR (400 MHz, DMSO-d<sub>6</sub>, 298 K, TMS) δ = 2.10 (m, 2H, -CH<sub>2</sub>-), 2.35 (m, 2H, -CH<sub>2</sub>-), 3.65 (s, 3H, -CH<sub>3</sub>), 3.98 (m, 2H, -CH<sub>2</sub>-N<sup>+</sup>-), 4.61 (m, 2H, -CH<sub>2</sub>-N<sup>+</sup>-), 7.07 (s, 2H, -NH<sub>2</sub>), 8.33 (s, 1H, H8), 13.4 (s, 1H, H9). MS (ESI) (m/z) calcd for C<sub>10</sub>H<sub>15</sub>N<sub>6</sub><sup>+</sup>, [M]<sup>+</sup>: 219.14; found: 219.14.

#### N-[4-(2-Amino-9H-purin-6-yl)-benzyl]-2,2,2-trifluoro-acetamide (7)

To a solution of **4** (2.34 g, 10 mmol) in anhydrous DMF (100 mL) were added 60% NaH (1.2 g, 30 mmol) under N<sub>2</sub> atmosphere at room temperature. After 30 min, **6** (2.54 g, 10 mmol) and DMAP (122 mg, 1 mmol) were added and the reaction mixture was stirred for 19 h at room

temperature. The solution was concentrated *in vacuo*. The crude residue was dissolved in MeOH, adsorbed on SiO<sub>2</sub> (20 g), and purified by column chromatography with CHCl<sub>3</sub> : MeOH (9 : 1) to give **7** (1.24 g, 34%) as a white solid. **<sup>1</sup>H-NMR** (400 MHz, DMSO-d<sub>6</sub>, 298 K, TMS)  $\delta$  = 4.40 (d, J=5.8 Hz, 2H, -CH<sub>2</sub>-CO-), 5.46 (s, 2H, -CH<sub>2</sub>-O-), 6.30 (s, 2H, -NH<sub>2</sub>), 7.21-7.50 (m, 4H, Ar), 7.81 (s, 1H, H8), 10.01 (s, 1H, -NH-CO-), 12.42 (1H, s, H9). **MS (ESI)** (m/z) calcd for C<sub>15</sub>H<sub>13</sub>F<sub>3</sub>N<sub>6</sub>O<sub>2</sub>Na, [M+Na]<sup>+</sup>: 389.10; found: 389.10.

#### **O<sup>6</sup>-(4-Amino-methylbenzyl)guanine (8)**

To a solution of **7** (915 mg, 2.5 mmol) in MeOH (90 mL) and H<sub>2</sub>O (10 mL) were added K<sub>2</sub>CO<sub>3</sub> (1.7 g, 12.5 mmol) under reflux for 3 h at 60 °C. The reaction mixture was concentrated *in vacuo*. The crude residue and dissolved in MeOH and H<sub>2</sub>O, adsorbed on SiO<sub>2</sub> (10 g), and purified by column chromatography with CHCl<sub>3</sub> : MeOH : Triethylamine (5 : 1 : 0.05) to give **8** (588 mg, 87%) as a white solid. **<sup>1</sup>H-NMR** (400 MHz, DMSO-d<sub>6</sub>, 298 K, TMS)  $\delta$  = 3.97 (s, 2H, -CH<sub>2</sub>-N<sub>2</sub>-), 5.47 (s, 2H, -CH<sub>2</sub>-O-), 6.22 (s, 2H, -NH<sub>2</sub>, guanine), 7.36-7.47 (m, 4H, Ar), 7.81 (s, 1H, H8). **MS (ESI)** (m/z) calcd for C<sub>13</sub>H<sub>14</sub>N<sub>6</sub>O<sub>2</sub>Na, [M+Na]<sup>+</sup>: 293.28; found: 293.28.

#### **BG-MUA (1)**

**8** (135 mg, 0.5 mmol), 11-mercaptoundecanoic acid N-succinimidyl ester (162 mg, 0.5 mmol), and DIEA (0.4ml, 2.5 mmol) were added in anhydrous DMF (5 mL). The mixture was stirred 5 hr at 50°C and then evaporated. The residue was purified by silica chromatography (CHCl<sub>3</sub>: MeOH = 5 : 1) and concentrated and dried *in vacuo* to get white powder of **1** (125 mg, 53%). **<sup>1</sup>H-NMR** (400 MHz, DMSO-d<sub>6</sub>, 298 K)  $\delta$  = 1.24-1.32 (m, 12H, -CH<sub>2</sub>-), 1.50-1.53 (m, 4H, HS-CH<sub>2</sub>-CH<sub>2</sub>-, CO-CH<sub>2</sub>-CH<sub>2</sub>-), 2.12-2.44 (m, 2H, CO-CH<sub>2</sub>-), 2.44-2.50 (m, 2H, HS-CH<sub>2</sub>-), 5.46 (s, 2H, -CH<sub>2</sub>-O-), 6.25 (s, 2H, -NH<sub>2</sub>, guanine), 7.25-7.45 (m, 4H, Ar), 7.83 (s, 1H, H8), 10.05 (s, 1H, -NH-CO-). **<sup>13</sup>C-NMR** (100 MHz, DMSO-d<sub>6</sub>, 298 K, TMS)  $\delta$  = 23.9, 25.1, 28.5, 28.8, 33.0, 35.0, 66.6, 95.3, 127.1, 128.4, 134.9, 138.4, 139.6, 155.8, 159.4, 172.6. **MS (ESI)** (m/z) calcd for C<sub>24</sub>H<sub>35</sub>N<sub>6</sub>O<sub>2</sub>S<sup>+</sup>, [M+H]<sup>+</sup>: 471.2537; found: 471.2537.

Reactions were monitored by thin-layer chromatography (TLC) carried out on Merck silica gel glass plates, 60F254. Silica gel chromatography was performed on Kanto Chemical silica gel N60 (40-50  $\mu$ m). NMR measurements were recorded at 27°C on JEOL ECP-400 (<sup>1</sup>H: 400 MHz, <sup>13</sup>C: 100 MHz), using residual undeuterated solvent as an internal reference. ESI-mass spectra were obtained with a Thermo Scientific Exactive.

#### 2) PC-QDs

PC-QDs were prepared from TOPO-coated CdSe/ZnS QDs<sup>1)</sup> (600 nm emission) by the ligand-exchange reaction as a previously reported method<sup>2)</sup>

### 3) BG-QDs

BG-QDs was prepared from the PC-QDs by the ligand-exchange reaction using BG-SH ligands. A typical procedure is as follows: 20  $\mu$ L of a DMSO solution of BG-SH (1  $\mu$ M) was added to 1 mL of an aqueous solution of PC-QDs (1  $\mu$ M, PBS) under vigorously stirring. After 2 hours, BG-QDs were purified by using a desalting column (PD-10, GE Healthcare) with PBS.

### 3. QD characterization

Fluorescence spectra of QDs were measured with a spectrofluorometer FP-8000 (JASCO Corporation) at the excitation wavelength of 488 nm. Dynamic light scattering measurements were carried out with Nano-ZS (Malvern) at pH = 7.4 (10 mM PBS). Fluorescence autocorrelation curves of QDs in aqueous solution were measured by using a compact FCS (C9413-01MOD, Hamamatsu Photonics) with a 473 nm semiconductor laser as an excitation light source. Fluorescence lifetime of QDs was measured using a lifetime fluorescence spectrofluorometer (Horiba) equipped with a LED laser (484 nm).

### 4. Preparation of SNAP-GFP

EGFP cDNA was amplified by TTCTCGAGATGGTGAGCAAGGGCGAG and ACGCGGCCGCTAGTGGTGATGGTGATGATGCTTGTACAGCTCGTCCATGCC including his-tag sequence and inserted to XhoI-NotI site of pSNAP-tag(T7)-2 (NEB). pSNAP-EGFP was transformed into *E. coli* KRX competent cells (Promega) grown in LB media with ampicilin at 37°C on shaking table. To induce production of the targeted protein, isopropyl beta-D-1-thiogalactopyranoside (0.1 mM) and L-Rhamnose (1 %) were added to the LB media, and then incubated with shaking gently for 12 hr at 18°C. The cells were lysed and suspended with binding buffer (50 mM Tris-HCl, pH=8.0). The purification was performed using Ni-NTA column (GE healthcare) and the expression was checked by CBB staining method.

### 5. Agarose gel electrophoresis

BG-QDs, PC-QDs, BG-QDs + SNAP-GFP (1:5 molar ratio), and PC-QDs + SNAP-GFP (1:5 molar ratio) were run on a 1% agarose gel (25 mM TAE buffer) that was applied on 100 V for 30 min. Fluorescence spots (> 600 nm) of the QDs were observed under irradiation of light at 460 nm using a luminescent image analyzer (GE Healthcare, Image Quant 4010).

### 6. Preparation of SNAP-tagged dynein

As SNAP-tagged dynein, we expressed and purified GST dimer of *Dictyostelium* cytoplasmic dynein motor domain (GST380) as previously described.<sup>3)</sup> The equivalent construct of human cytoplasmic dynein 1 (GST-D382)<sup>4)</sup> was provided courtesy of Dr. Ken'ya

Furuta, National Institute of Information and Communications Technology, Japan. To conjugate the SNAP-tagged dynein on BG-QDs, the dynein and the quantum dots were mixed with the mixing ratio of 10:1 (dynein: QD) in assay buffer (20 mM PIPES-KOH, 10 mM potassium acetate, 4 mM MgSO<sub>4</sub>, 1 mM EGTA, pH 7.0) and incubated for 30 min at room temperature. Tubulin was purified from porcine brain through four cycles of polymerization and depolymerization using a high-molarity PIPES buffer to remove microtubule-associated proteins effectively.<sup>5)</sup> Then, purified tubulin was labeled with Alexa Fluor 488 (A20000, Life technologies) or biotin (21336, Life technologies) as described previously.<sup>6)</sup> Fluorescently labeled microtubules were prepared by copolymerization of 103 μM non-labeled tubulin, 2 μM Alexa488-labeled tubulin and 3 μM biotin-labeled tubulin for 30 min at 37 °C and stabilized with paclitaxel (169-18616, Wako).

## 7. Single-molecule fluorescence imaging

Surface of cover glasses (C022221S, Matsunami Glass) was cleaned by sonication in 1N KOH and by plasma treatment (Diener), and then silanized with N-2-(aminoethyl)-3-aminopropyl-triethoxysilane (KBE-603, Shin-Etsu Chemical). To make PEG-coated and PEG-biotin-coated glasses, the amino-silanized glasses were incubated with PEG solution (200 mg/mL NHS-PEG [ME-050-TS, NOF] in 50 mM MOPS, pH 7.5) or PEG-biotin solution (1 mg/mL NHS-PEG-biotin [BI-050-TS, NOF] and 200 mg/mL NHS-PEG in 50 mM MOPS, pH 7.5) for 3 hours at room temperature, respectively.<sup>7)</sup> Glass chamber for observation was prepared by separating a PEG-coated glass and a PEG-biotin-coated glass with a 30-μm layer of double sticking tape (5603, Nitto-Denko).<sup>8)</sup> The microtubules were immobilized on the PEG-biotin-coated glass surface via Neutravidin (31000, Thermo). Then, glass surface was blocked with 1% (w/v) Pluronic F-127 (P2443, Sigma-Aldrich) and 1 mg/mL casein (218680, Merck Millipore) in assay buffer. Finally, the chamber was filled with imaging solution containing 300 pM QD-dynein, 20 mM PIPES-KOH, 10 mM potassium acetate, 4 mM MgSO<sub>4</sub>, 1 mM EGTA, 1 mM ATP, 1% (w/v) Pluronic F-127, 1 mg/mL casein, 2 mM dithiothreitol, 0.2 mg/mL glucose oxidase, 40 μg/mL catalase, 1 mM glucose, 10 μM paclitaxel, pH 7.0. The sample was illuminated by a blue laser (Sapphire488-500, Coherent) or a green laser (Sapphire 552-200, Coherent). The images of microtubules and QDs were observed under total internal reflection fluorescence microscopy (IX81, Olympus) with a 100x objective lens (UPlanSApo, NA 1.40, Olympus) and recorded at the frame rate of 10 frames per second using iXon3 EM CCD camera (Andor).

## References

- 1) A. Komatsuzaki, T. Ohyanagi, Y. Tsukasaki, Y. Miyanaga, M. Ueda and T. Jin, *Small*, 2015, **11**, 1396-1401.
- 2) T. Ohyanagi, N. Nagahori, K. Shimawaki, H. Hinou, T. Yamashita, A. Sasaki, T. Jin, T. Iwanaga, M. Kinjo and S. I. Nishimura, *J. Am. Chem. Soc.*, 2011, **133**, 12507-12517.
- 3) N. Numata, T. Shima, R. Ohkura, T. Kon and K. Sutoh, *FEBS Letters*, 2011, **585**(8), 1185-1190
- 4) T. Torisawa, M. Ichikawa, A. Furuta, K. Saito, K. Oiwa, H. Kojima, Y. Y. Toyoshima and K. Furuta, *Nature Cell Biology*, 2014, **16**(11), 1118–1124.
- 5) A. Desai and T. J. Mitchison, *Methods Enzymol*, 1998, **298**, 125–132.
- 6) M. Castoldi and A. V. Popov, *Protein Expression and Purification*, 2003, **32**(1), 83–88.
- 7) T. Kon, T. Shima and K. Sutoh, *Methods in Cell Biology*, 2009, **92**, 65–82.
- 8) H. Yokota, Y.-W. Han, J.-F. Allemand, X. G. Xi, D. Bensimon, V. Croquette and Y. Harada, *Chemistry Letters*, 2009, **38**(4), 308–309.

## Additional figures

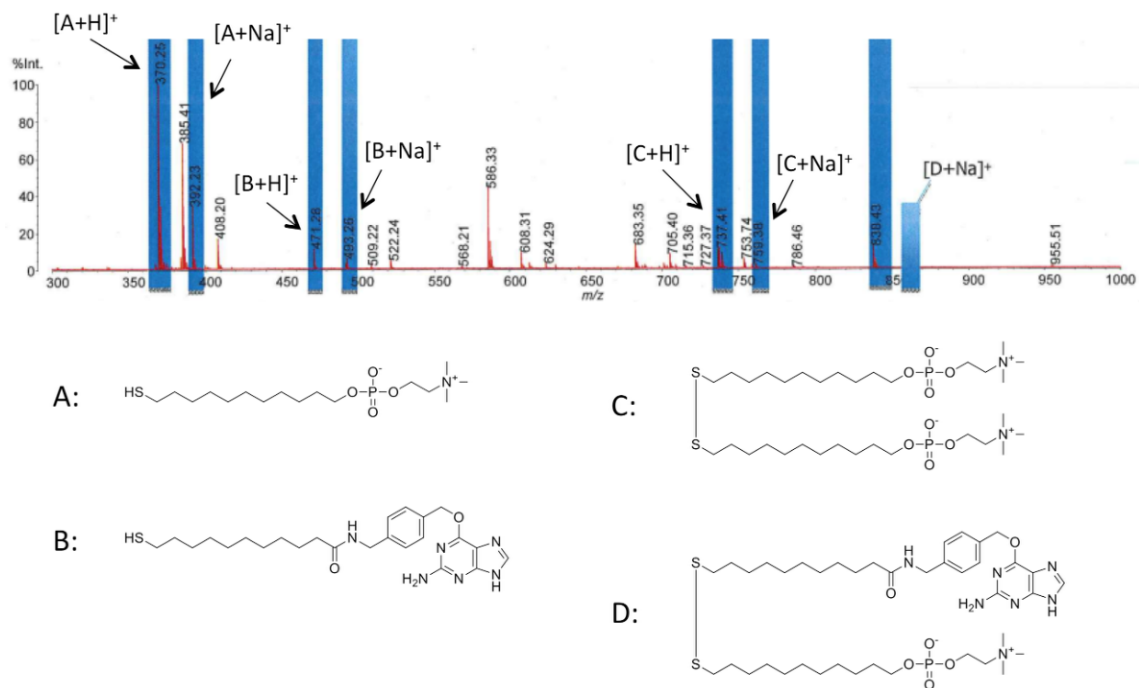

**Fig. S1** MALDI-TOF mass spectrum of BG-QD.

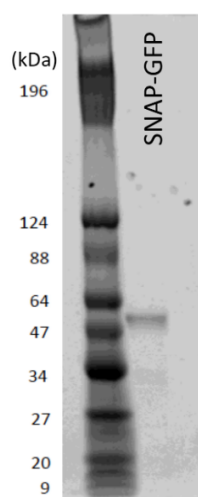

**Fig. S2** SDS-PAGE of SNAP-GFP (47.7 kDa).

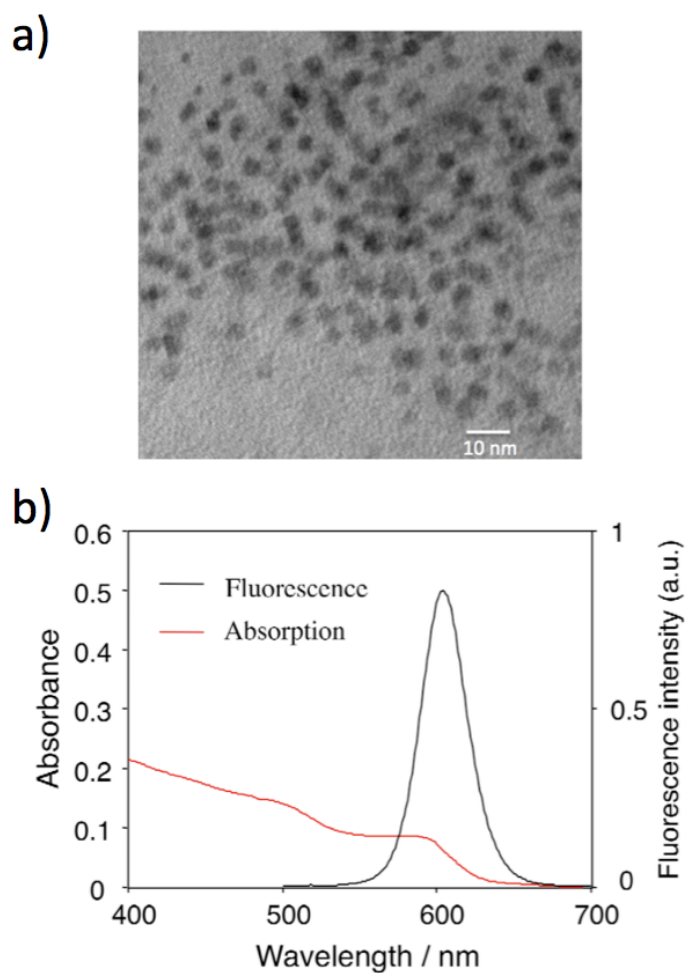

**Fig. S3** Transmission electron microscopy (TEM) image (a) and absorption/fluorescence spectra (b) of BG-QD. The TEM image was obtained using a H800 (HITACHI) at 200 kV accelerating voltage.



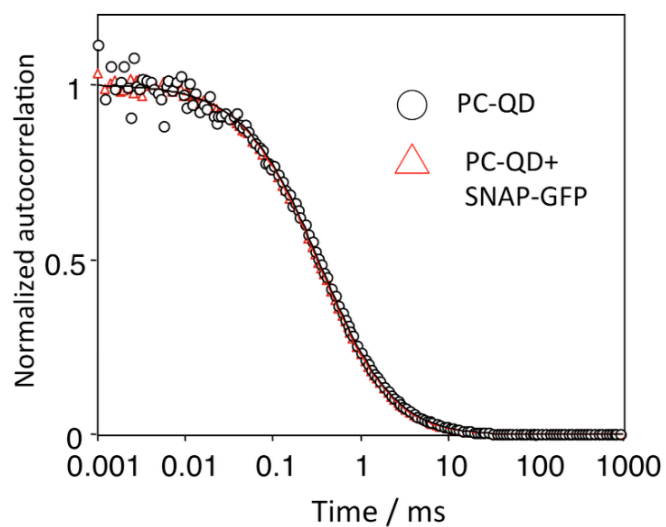

**Fig. S4** Fluorescence autocorrelation curves for PC-QD and PC-QD+SNAP-GFP (1:5) in PBS.

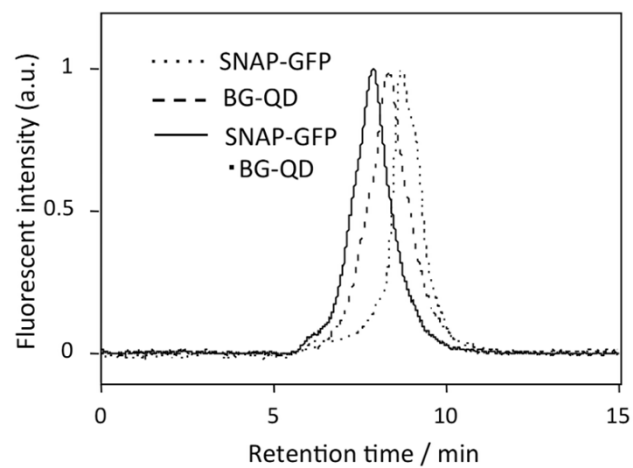

**Fig. S5** Size-exclusion gel chromatography for SNAP-GFP, BG-QD and SNAP-GFP · BG-QD. Column: TSK gel G4000 SW<sub>XL</sub> (TOSOH); Eluent, 0.01 M Na<sub>2</sub>CO<sub>3</sub> aqueous solution; Elution rate: 1mL/ min.

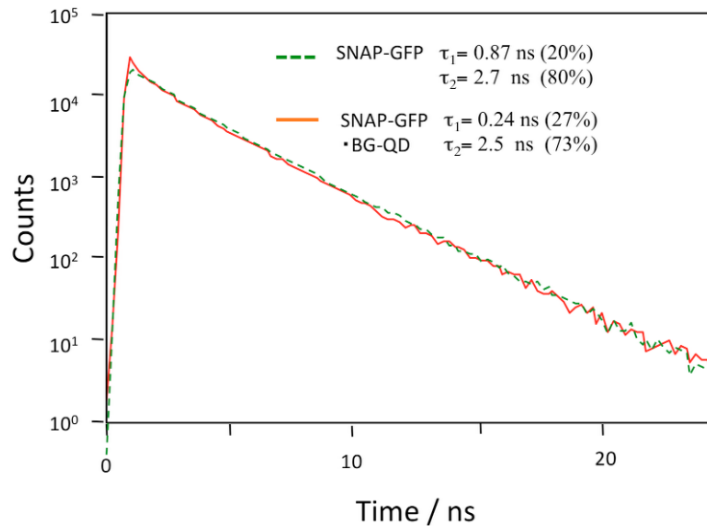

**Fig. S6** Fluorescence lifetime of GFP emission in SNAP-GFP and SNAP-GFP · BG-QD in PBS .

### Movie Information

#### Movie-1 (mp4)

Total internal reflection fluorescence microscopy shows BG-QD conjugated *Dictyostelium* cytoplasmic dynein (magenta spots) moving along microtubules (cyan lines) in the presence of 1 mM ATP. The both width and height of the field are 10.9  $\mu\text{m}$ .

#### Movie-2 (mp4)

Same as *Dictyostelium* dynein (Movie-1), BG-QD conjugated human cytoplasmic dynein 1 (magenta spots) moving along microtubules (cyan lines) in the presence of 1 mM ATP. The width and height of the field is 7.5  $\mu\text{m}$  and 5.8  $\mu\text{m}$ , respectively.
